# Supplementary material for: Virtual Instruction On Demand for Educational Orientation of Graduate Medical Education Trainees During The COVID-19 Pandemic
Source: Research Square preprint supplement (doi:10.21203/rs.3.rs-737910/v1), 2021-09-07
Supplement: Supplementary file 1 [file 297cfd794b3fd08ed3619009.docx]

**Appendix A:** Objectives and goals of resident Graduate Medical Education (GME) modules.

| ***Module Title*** | ***Goals and Objectives*** |
| --- | --- |
| Crew Resource Management | - Review the origin of crew resource management. - Provide a toolkit of behaviors, skills, and tools for building a robust safety culture. - Discuss standardized scripts to invite and communicate questions and concerns. - Reinforce how all team members are an integral part of the patient safety system. |
|  |  |
| Joint Rounding and Paging Etiquette | - Team rounding and points of emphasis - Simulation of team rounding with de-brief on areas to improve - Paging and EPIC secure chat etiquette overview with examples |
|  |  |
| Point-of-care ultrasound | - Basics and principles of how an ultrasound image is generated. - Basics of orientation of ultrasound probe and views that can be obtained. - How to interpret ultrasound findings to influence decision making. |
|  |  |
| Restraints | - When you should consider ordering restraints and what are the indications? - What are the types of restraints and what are some restraint alternatives? - What are the steps required to order restraints? |
|  |  |
| Effective handoffs | - Define standardized multidisciplinary bedside handoff. - Understand the importance of a detailed handoff. - Describe the process of a handoff and team member notes. - Share feedback from team members about the handoff process. |
|  |  |
| Misadventures in line and tube placement | - Common complications of lines and tube placement. - Common radiologic findings that can be seen for complications. |
|  |  |
| Epidemiology | - Resources available for epidemiology. - Indications and resources for PPE and isolation. - How to order different types of PPE and isolation? - COVID-19 safety and requirements. |
|  |  |
| Patient Safety | - Hands-on orientation to patient safety and identification of potential patient safety issues. - Simulation of patient safety and its reporting. |
|  |  |
| Quality Improvement | - Develop proficiency with DMAIC process improvement methodology to define and measure potential opportunities for meaningful healthcare improvement. - Understand the use quality improvement as a tool to deliver safe, effective, equitable, high value care. - Advance knowledge of quality improvement methodology and process improvement. - Help identify quality improvement projects and get involved in existing projects at the medical center or within your department. - Increase understanding of and ability to address healthcare disparities using quality improvement initiatives. |
|  |  |
| Medical Information Management | - Requirements for documentation and billing in a patient’s medical heath record. - Documenting procedures in a patient’s record. - HIPPA and patient confidentiality of patient information. - Reporting of complications and integrity of documentation. |
|  |  |
| LeadServeInspire | - Introduction to the LeadServeInspire curriculum and its benefits to medical teaching. |
|  |  |
| Patient with Limited English Proficiency | - Understand and develop skills to appropriately interact with patients with limited English Proficiency. - Simulation with virtual patient with limited English Proficiency. |
|  |  |
| Learning Environment and Student Mistreatment | - Creating an ideal learning environment. - Types of mistreatment and identifying when they occur. - Overview of trends of mistreatment in education at The Ohio State University - How to safely and adequately report mistreatment. - Clinical examples of mistreatment. |
|  |  |
| Professionalism | - Importance of professionalism. - Understand ways to professionally handle varying situations. |
|  |  |
| Empathetic communication | - Define empathy and understand its meaning. - Outline empathetic communication strategies. - Practice communication strategies. |
|  |  |
| Ombuds and Coaching Program | - Understand ombuds and its role. - Understand the role of the coach. - Toolkit for using these resources and working with the ombuds/coach. |
|  |  |
| Policies | - Examples of common policies for residents in regard to training and vacation. |
|  |  |
| Human Resources and Benefits | - Overview of resident benefits and understanding of how this can be tailored for each specific resident. - The role of human resources in your training and how to contact them. |
