# Supplementary material for: Virtual Instruction On Demand for Educational Orientation of Graduate Medical Education Trainees During The COVID-19 Pandemic
Source: Research Square preprint supplement (doi:10.21203/rs.3.rs-737910/v1), 2021-09-07
Supplement: Supplementary file 2 [file f9faffa7231291b147ffe36c.docx]

**Appendix B –** Survey Questions and Response options.

| **Question (Response)** |
| --- |
| ***How frequently will you use the content from this orientation to perform your duties at OSUWMC?***  Frequently  Occasionally  Sometimes  Rarely |
| ***How would you rate the overall quality of your graduate medical education orientation?***  Very good  Good  Acceptable  Poor  Very poor |
| ***How effective or ineffective was this virtual orientation for your learning?***  Very effective  Effective  Somewhat effective  Somewhat ineffective  Ineffective  Very ineffective |
| ***The Carmen course was easy to access.***  Strongly agree  Agree  Neutral  Disagree  Strongly disagree |
| ***The Carmen course was easy to navigate.***  Strongly agree  Agree  Neutral  Disagree  Strongly disagree |
| ***The orientation was well organized.***  Strongly agree  Agree  Neutral  Disagree  Strongly disagree |
| ***The modules supported my learning***  Strongly agree  Agree  Neutral  Disagree  Strongly disagree |
